# Supplementary material for: Gas2l3, a Novel Constriction Site-Associated Protein Whose Regulation Is Mediated by the APC/CCdh1 Complex
Source: PubMed Central journal article supplement (PMC3585356; doi:10.1371/journal.pone.0057532), 2013-02-28
Supplement: pone.0057532.s002.pdf [file pone.0057532.s002.pdf]

# Figure S2. siRNA experiments confirm Gas2l3 localization at the constriction sites and the specificity of the anti-hGas213 serum

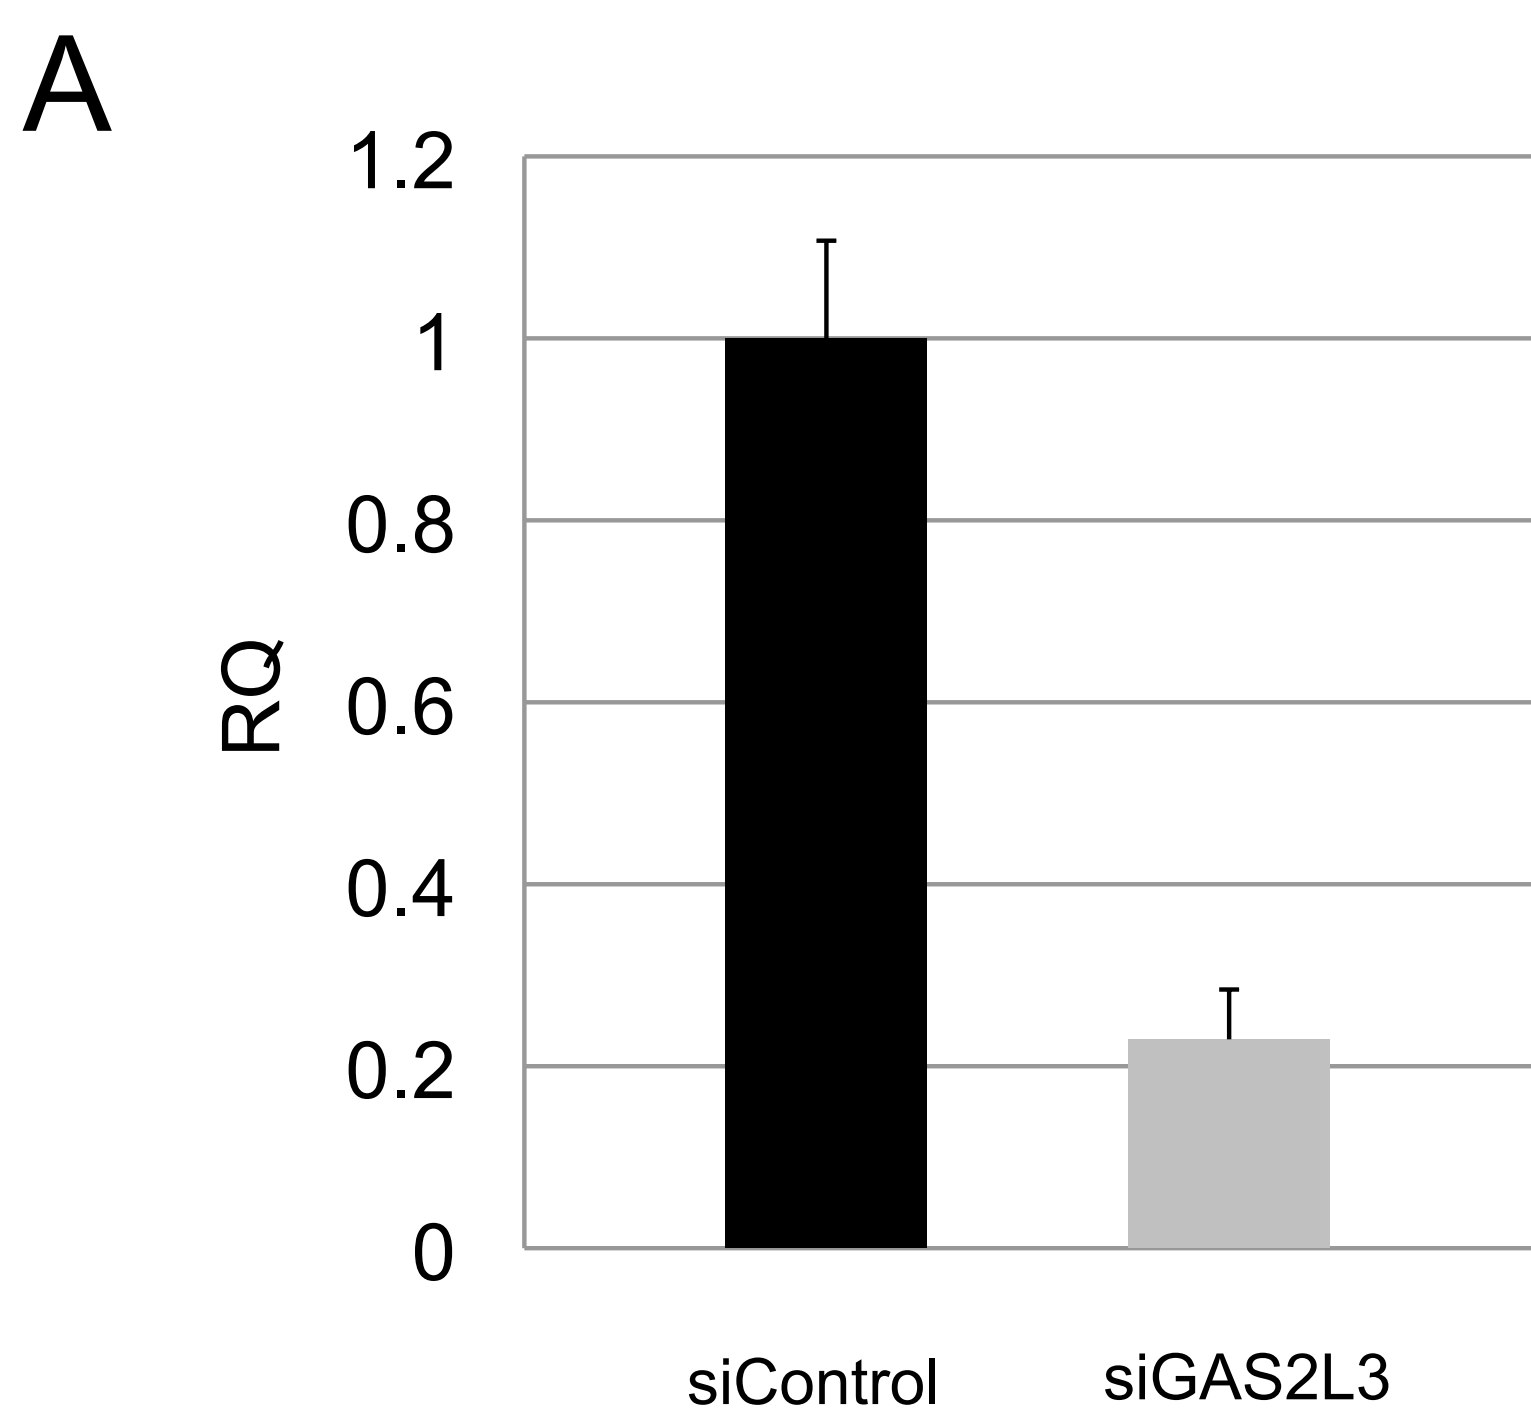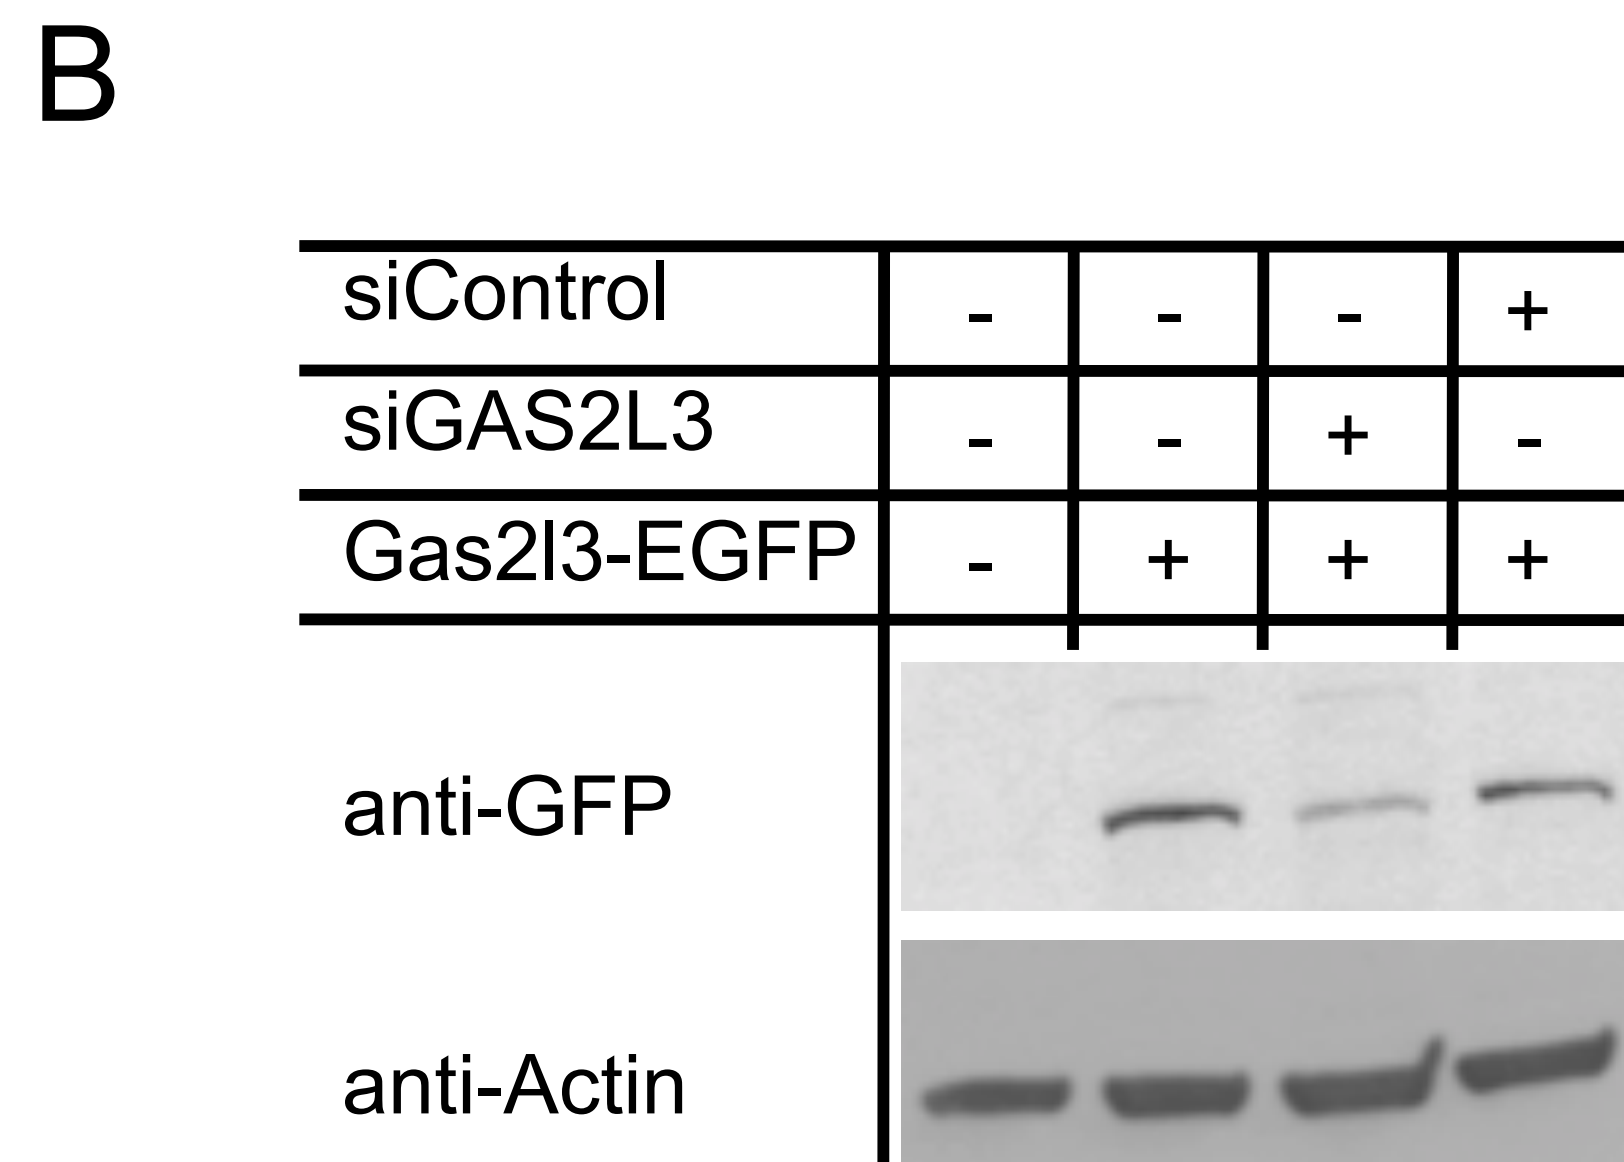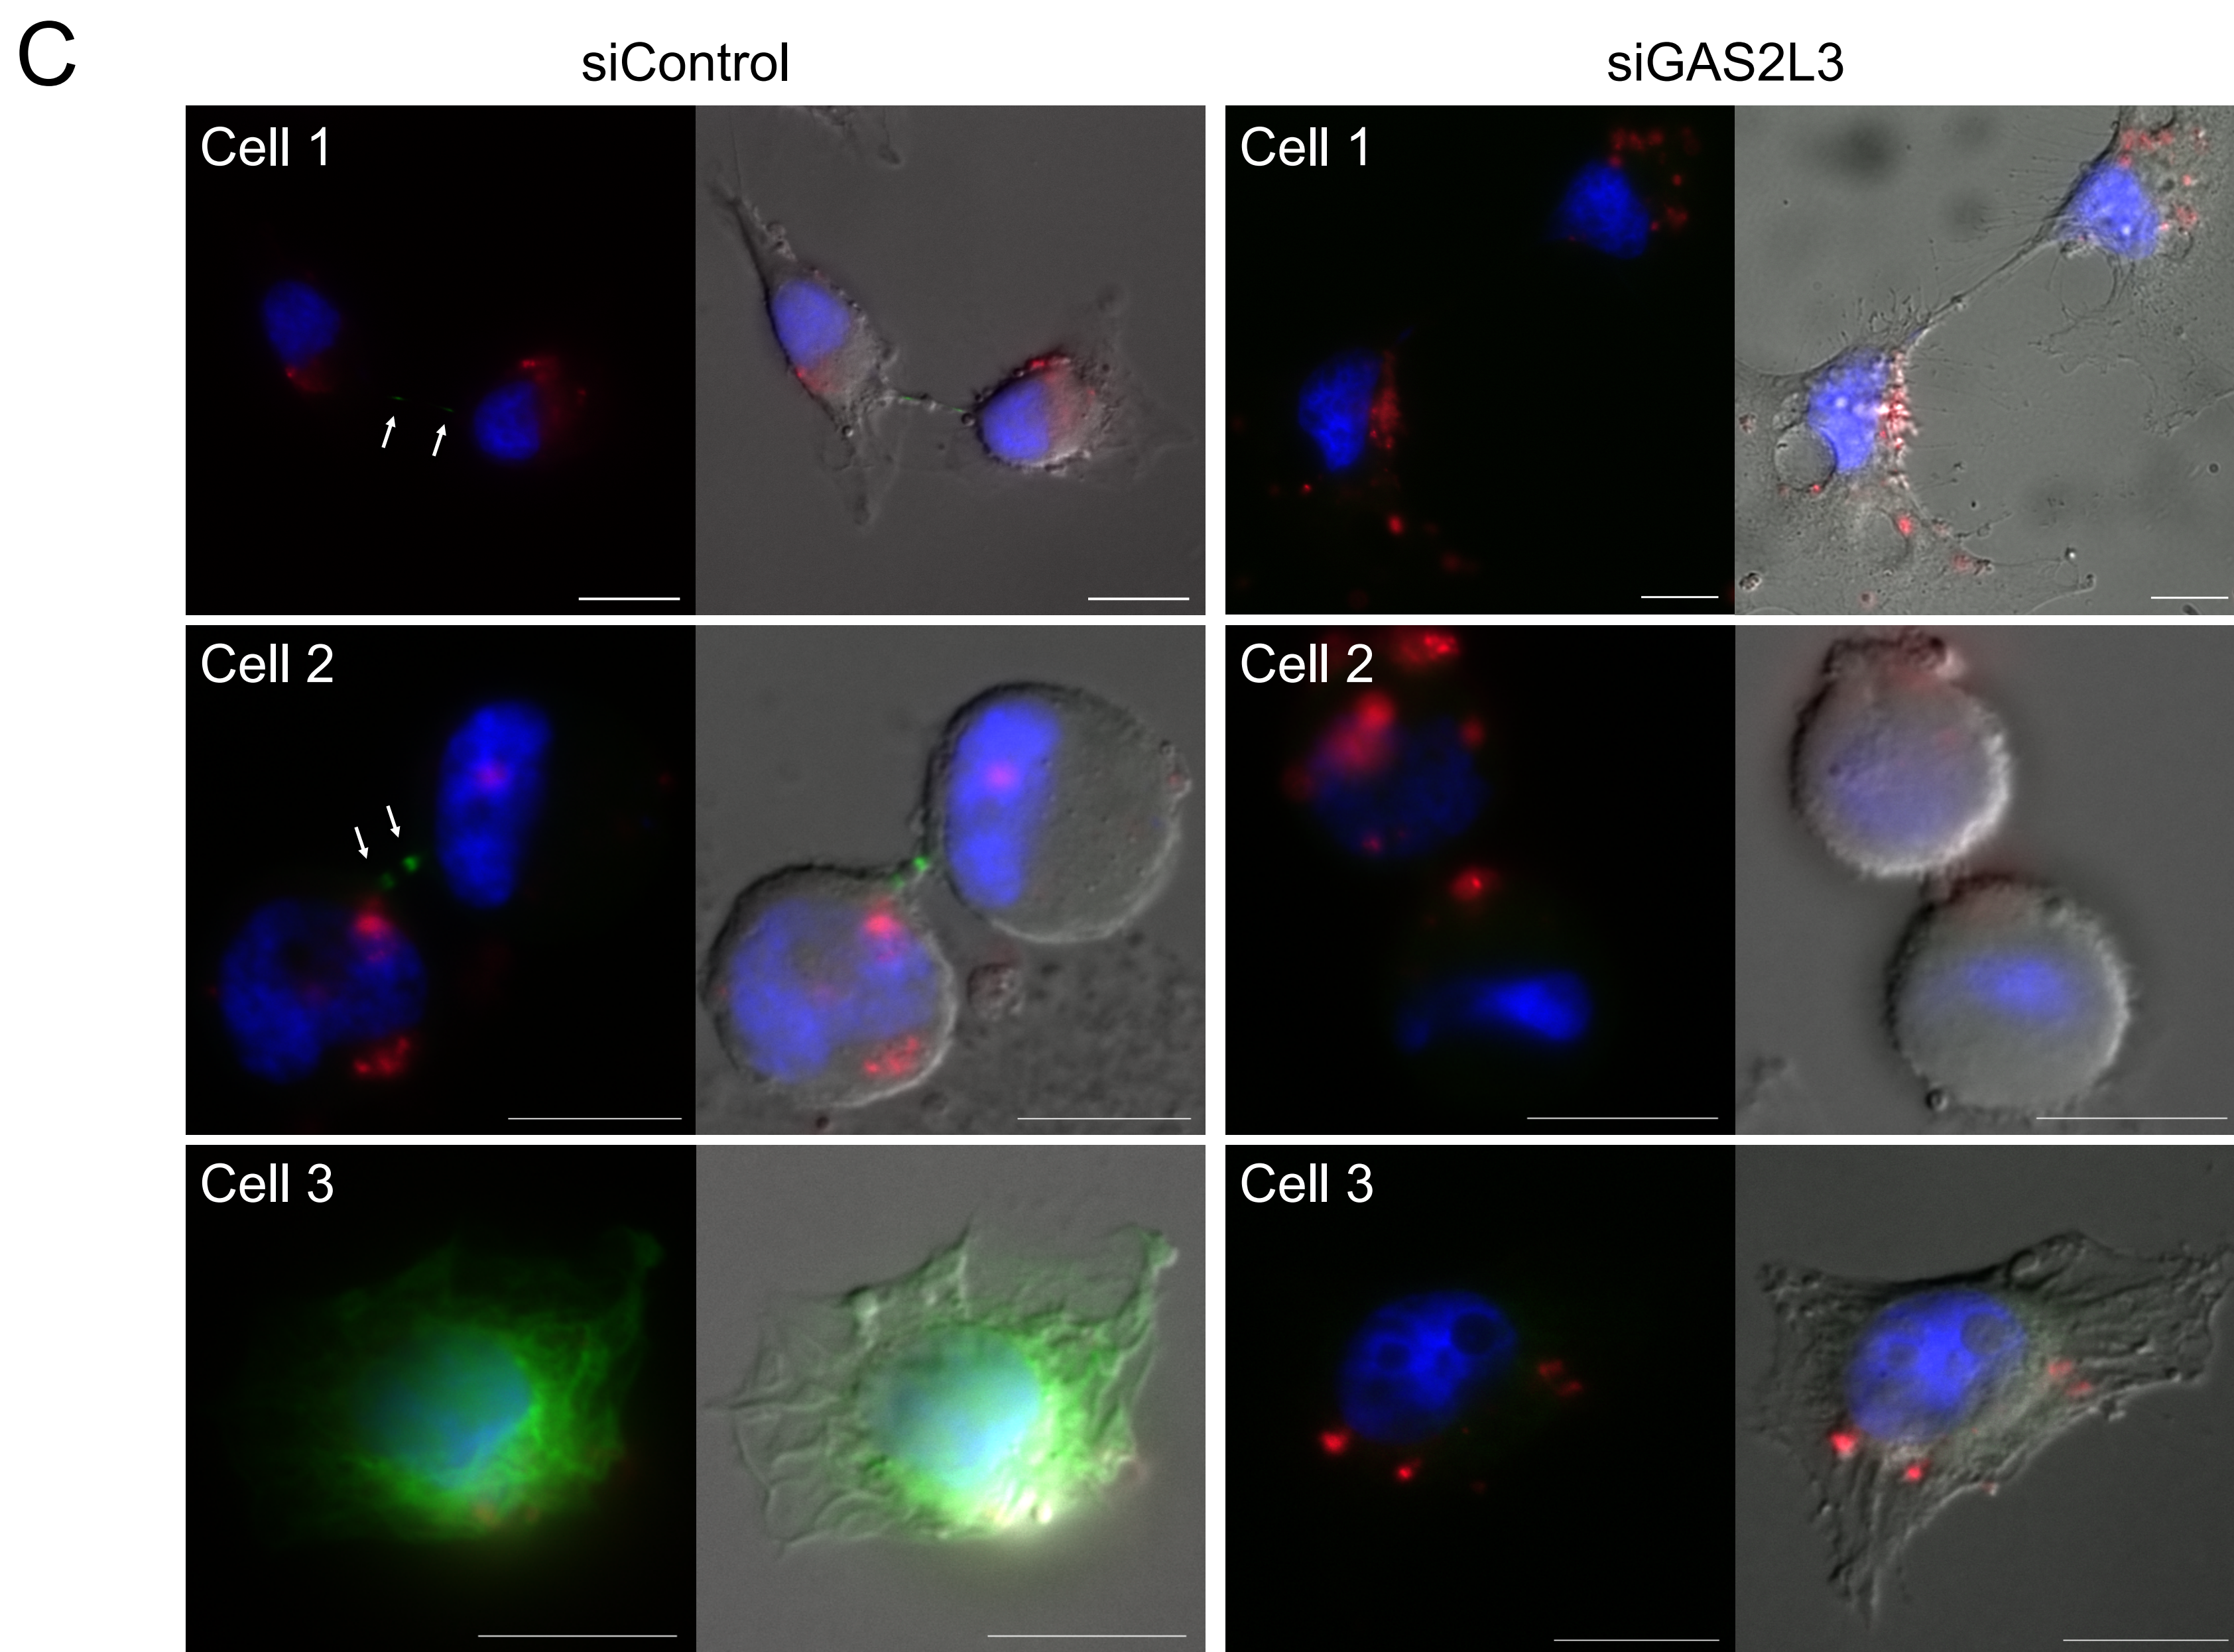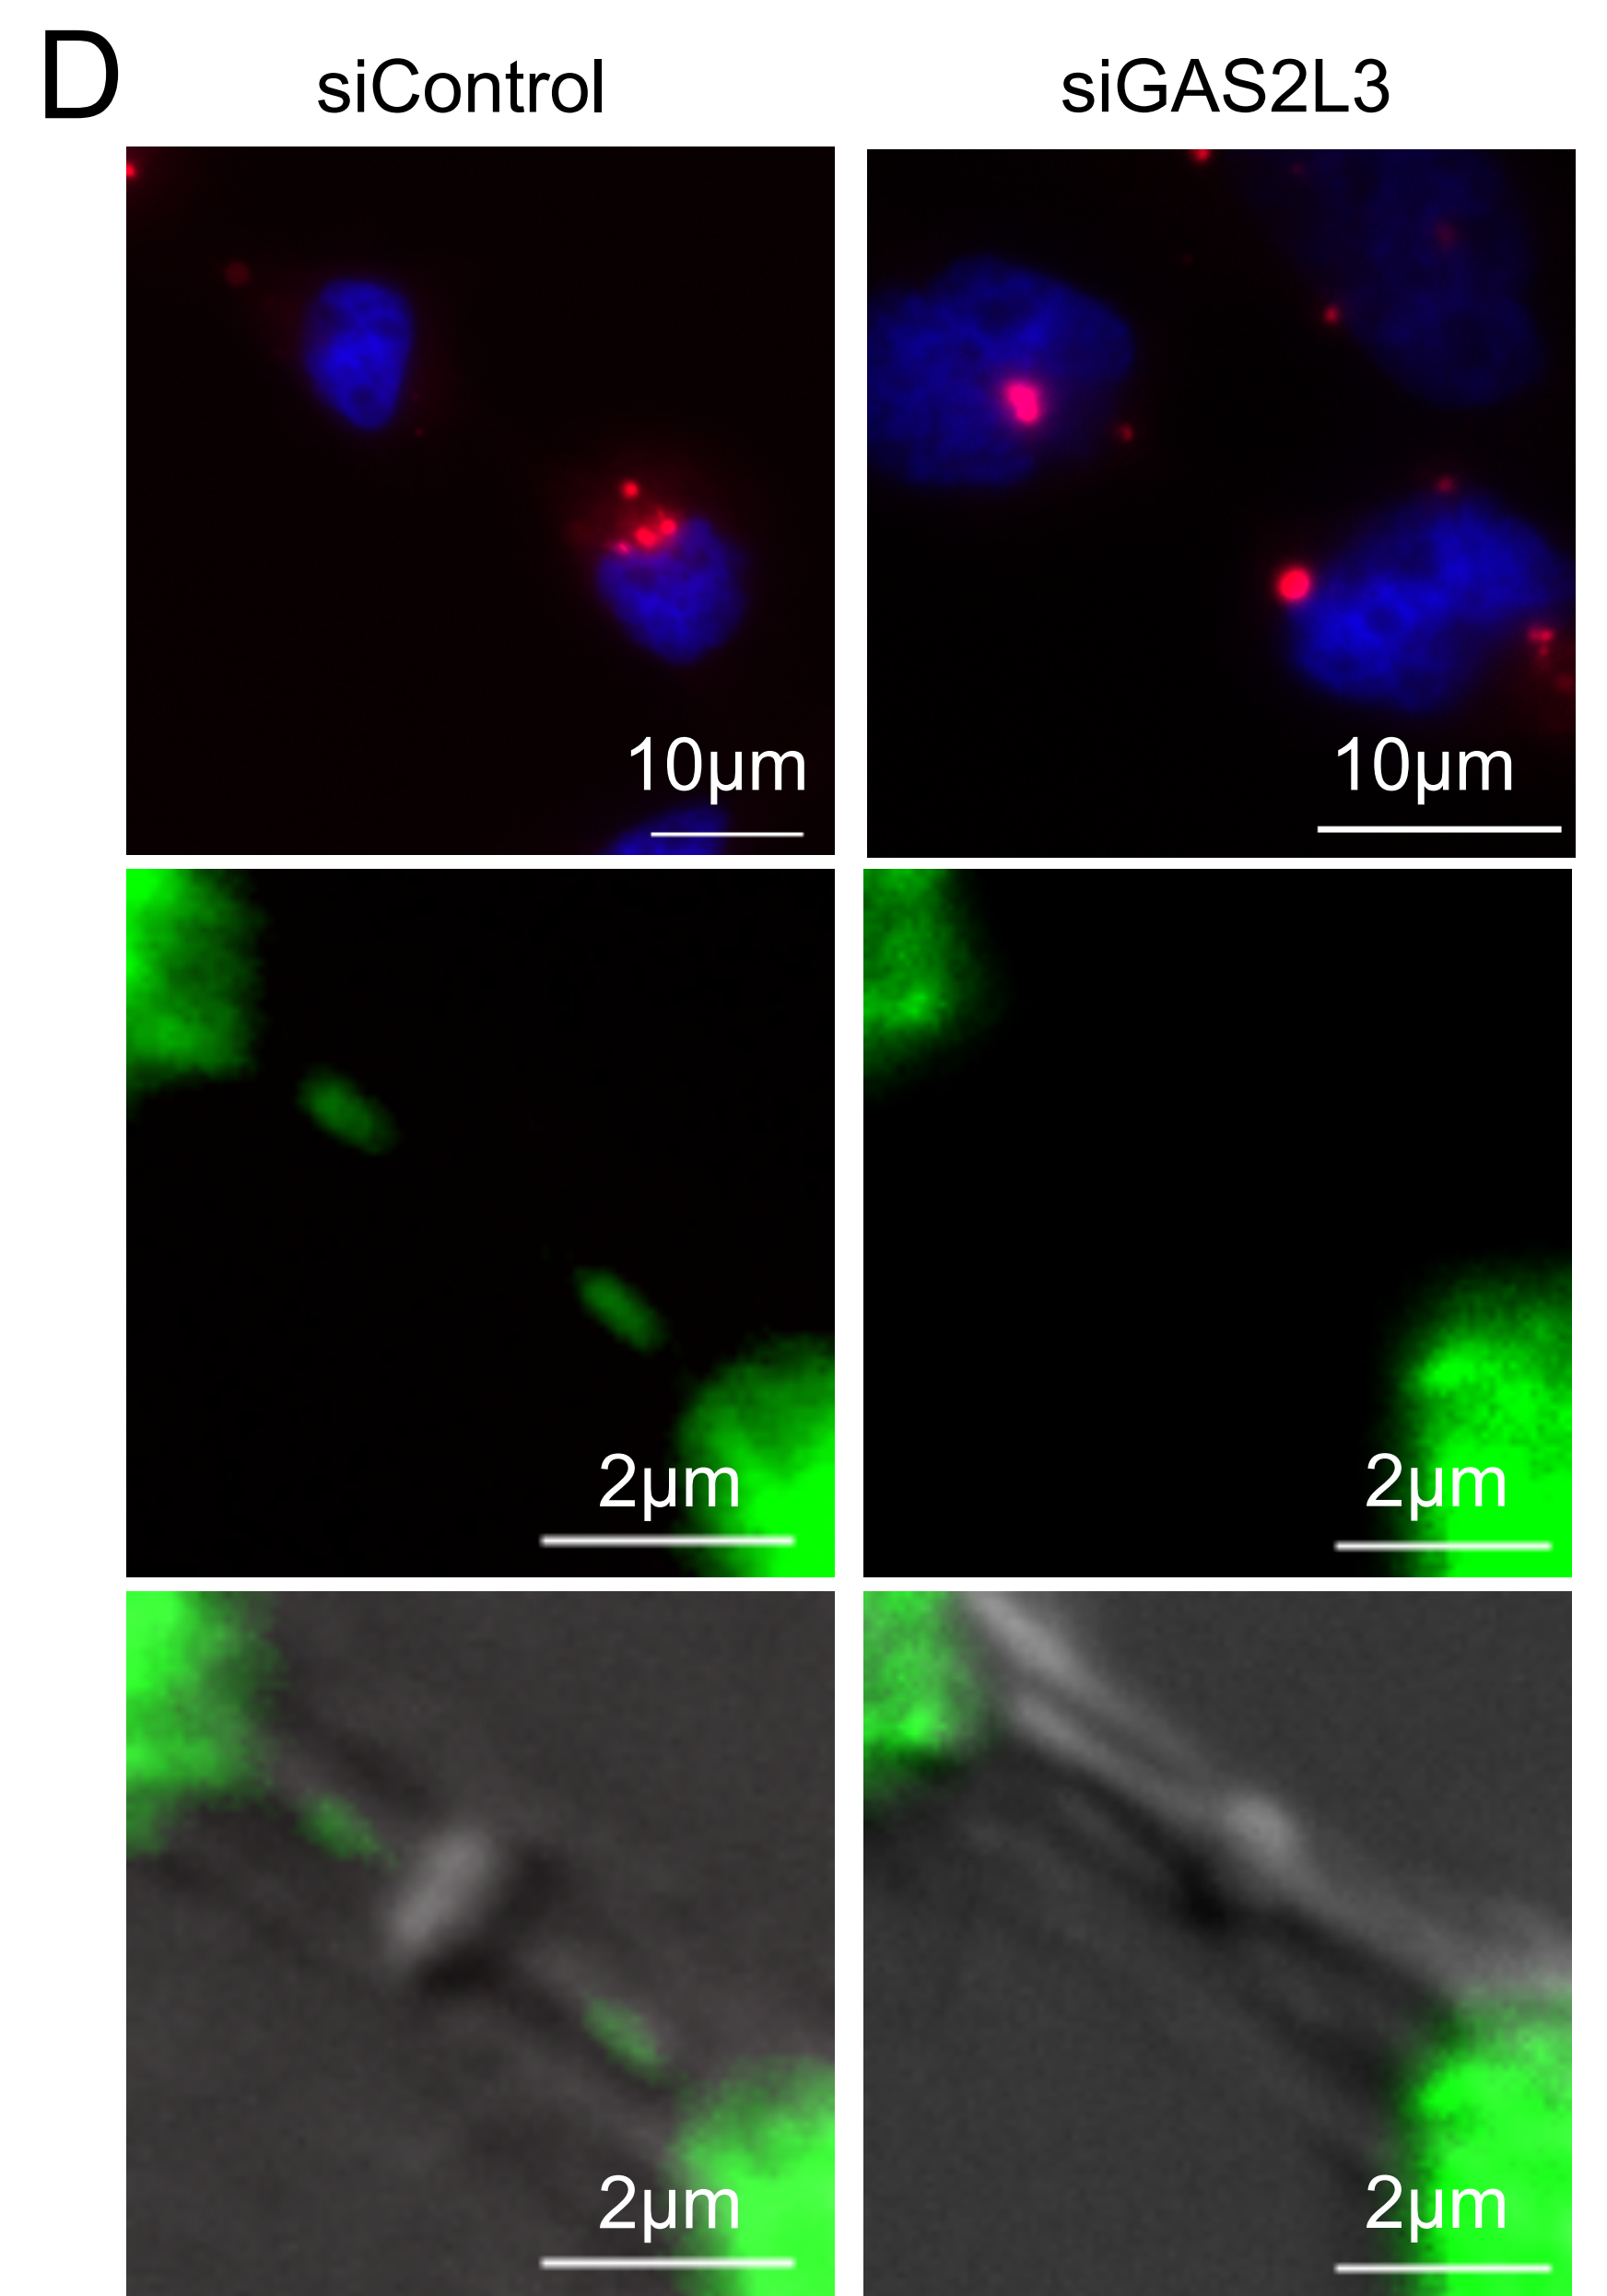

Gas2l3-DM4-EGFP; siGLO; DNA; Bar=10μm

Gas2l3; siGLO; DNA
