# Supplementary material for: Gas2l3, a Novel Constriction Site-Associated Protein Whose Regulation Is Mediated by the APC/CCdh1 Complex
Source: PubMed Central journal article supplement (PMC3585356; doi:10.1371/journal.pone.0057532), 2013-02-28
Supplement: pone.0057532.s003.pdf [file pone.0057532.s003.pdf]

**Figure S3.** The localization of Gas213 at the constriction sites is unaffected by the D-box

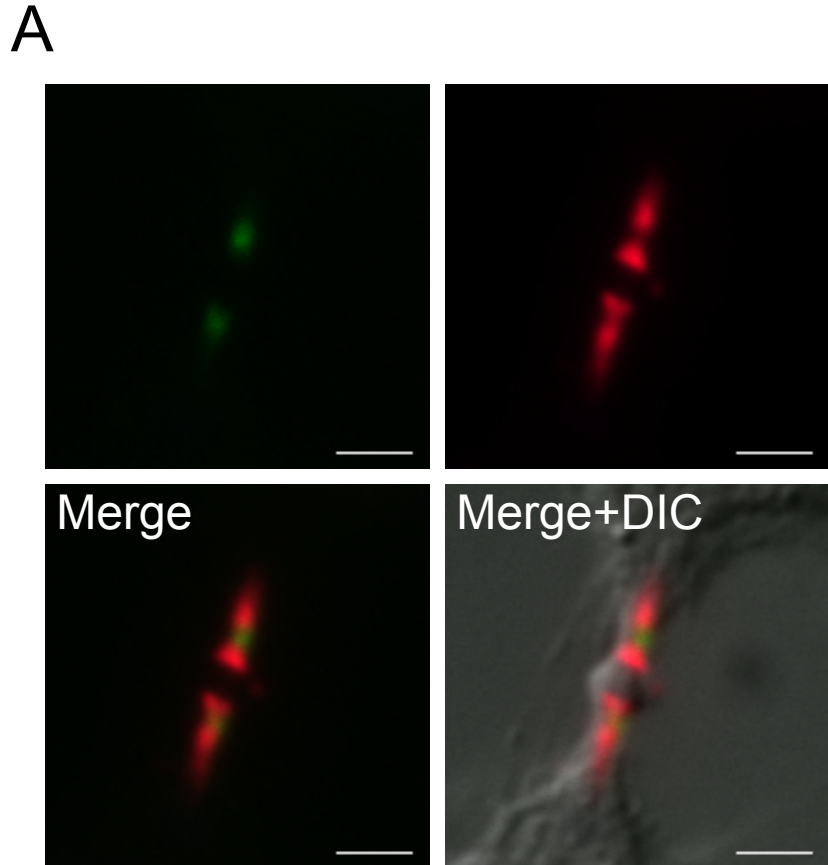

EGFP-Gas213; Aurora B; Bar 2um

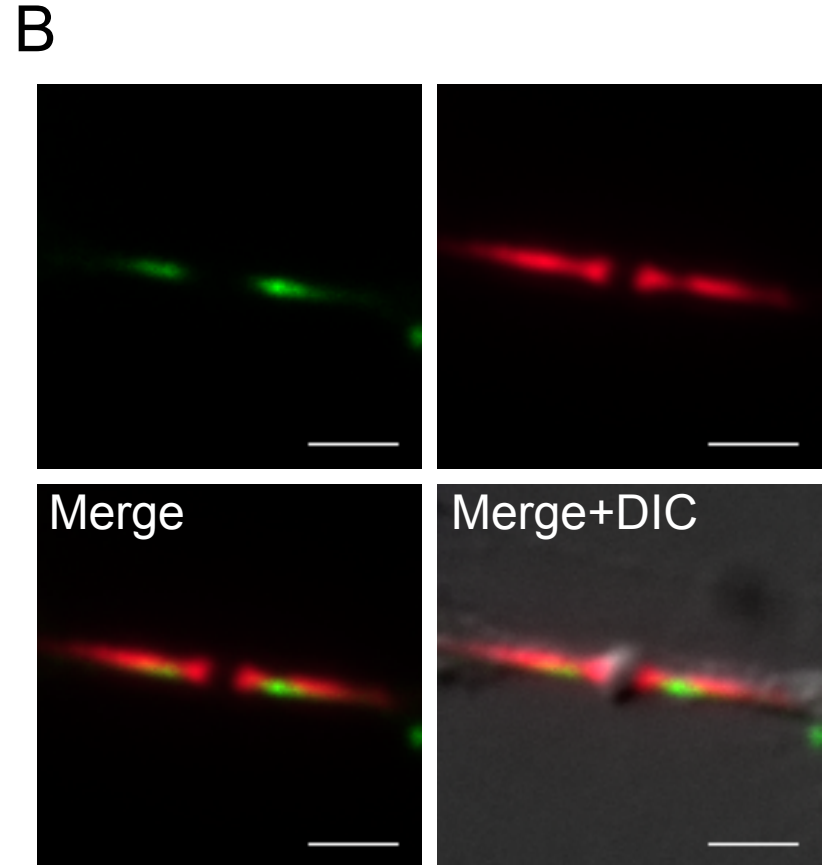

Gas213DM4-EGFP; Aurora B; Bar 2um
