# Supplementary material for: Gas2l3, a Novel Constriction Site-Associated Protein Whose Regulation Is Mediated by the APC/CCdh1 Complex
Source: PubMed Central journal article supplement (PMC3585356; doi:10.1371/journal.pone.0057532), 2013-02-28

# Figure S4. Gas2l3 mobility in SDS-PAGE is hardly shifted by mitotic phosphorylation

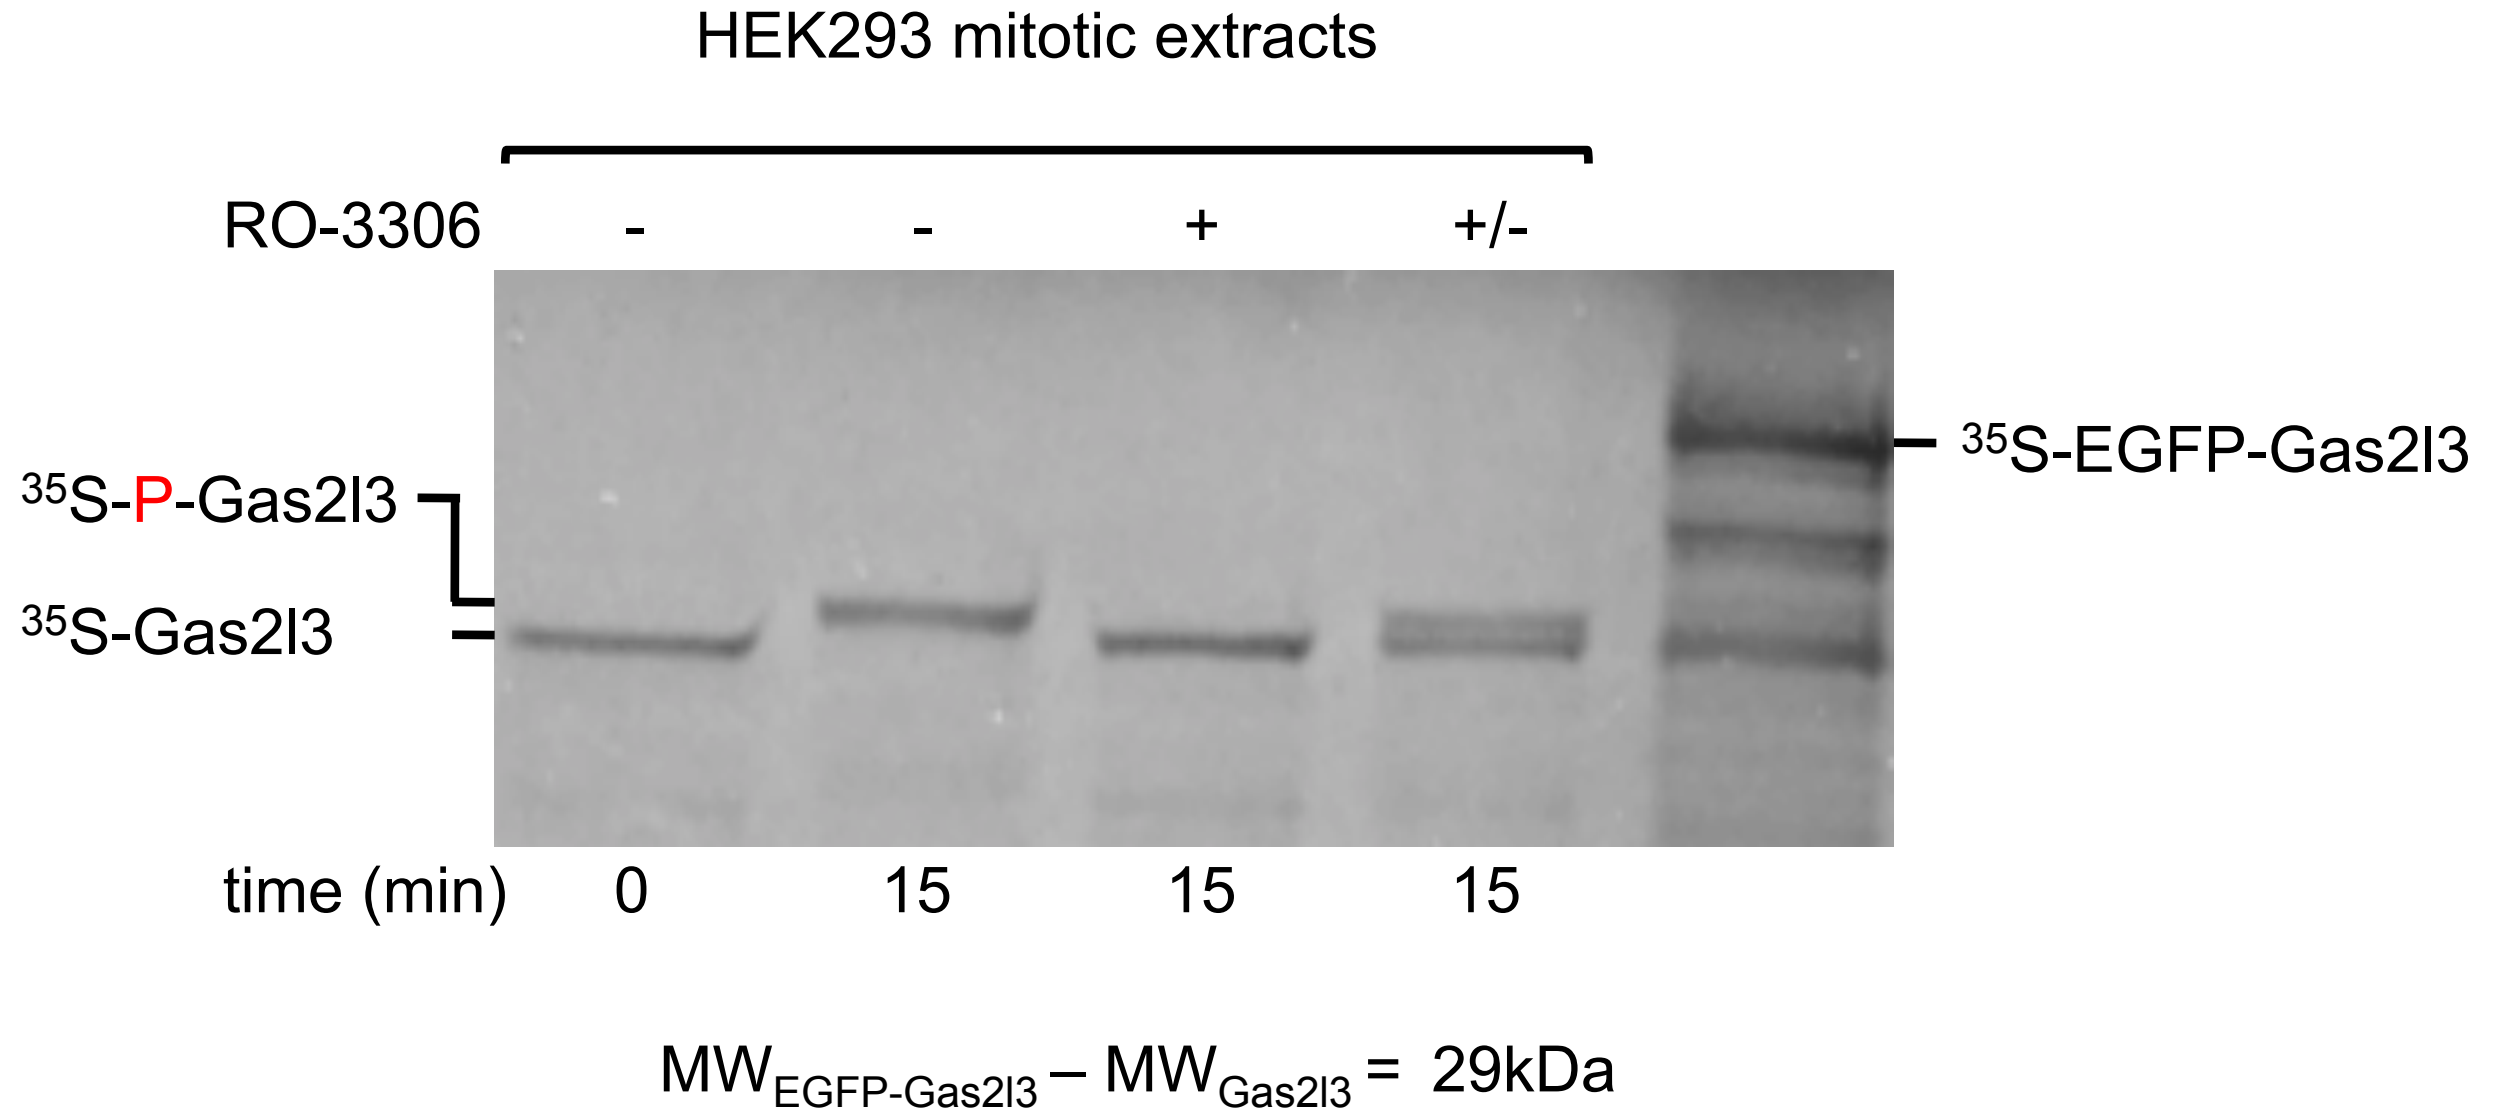

Supplement: pone.0057532.s004.pdf [file pone.0057532.s004.pdf]
