# Supplementary material for: Gas2l3, a Novel Constriction Site-Associated Protein Whose Regulation Is Mediated by the APC/CCdh1 Complex
Source: PubMed Central journal article supplement (PMC3585356; doi:10.1371/journal.pone.0057532), 2013-02-28

**Figure S5.** HEK293 cells expressing non-degradable full-length Cyclin B1 arrest in mitosis

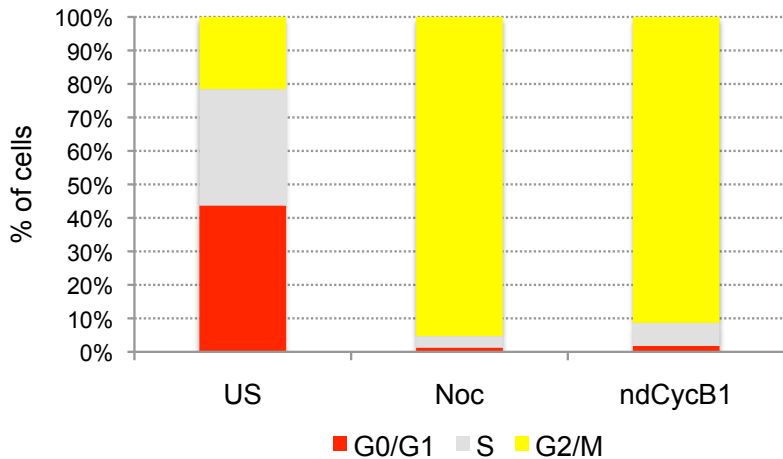

Supplement: pone.0057532.s005.pdf [file pone.0057532.s005.pdf]
